# Supplementary material for: Induction of NK cell reactivity against acute myeloid leukemia by Fc-optimized CD276 (B7-H3) antibody
Source: PubMed Central journal article supplement (PMC11026476; doi:10.1038/s41408-024-01050-6), 2024-04-18
Supplement: 41408_2024_1050_MOESM1_ESM.pdf [file 41408_2024_1050_MOESM1_ESM.pdf]

## Supplemental Material

### Key resources table

| Reagent or Resource                                      | Vendor                   | Cat. number    |
|----------------------------------------------------------|--------------------------|----------------|
| <b>Antibodies</b>                                        |                          |                |
| human IgG                                                | Merck KGaA               | I4506          |
| mouse IgG-UNLB                                           | SouthernBiontech         | 0107-01        |
| mouse IgG1                                               | BD Pharmingen            | 557273         |
| goat anti-mouse IgG, F(ab') <sub>2</sub>                 | DAKO                     | R0480          |
| goat anti-Human IgG, F(ab') <sub>2</sub>                 | Jackson ImmunoResearch   | 109-116-097    |
| mouse anti-human CD33 BV510                              | BioLegend                | 303422         |
| mouse anti-human CD34 BV421                              | BioLegend                | 343610         |
| mouse anti-human CD38 FITC                               | BD Pharmingen            | 555459         |
| mouse anti-human CD3 APC/Fire750                         | BioLegend                | 344840         |
| mouse anti-human CD56 PECy7                              | BioLegend                | 318318         |
| mouse anti-human CD16 APC                                | BioLegend                | 302011         |
| mouse anti-human IFN $\gamma$ PE                         | BD Pharmingen            | 554701         |
| 7-AAD Viability Staining Solution                        | BioLegend                | 420404         |
| LIVE/DEAD™ Fixable Aqua Dead Cell Stain Kit              | Thermo Fisher Scientific | L34966         |
| mouse anti-human CD107a PE                               | BD Pharmingen            | 555801         |
| mouse anti-human CD69 PE                                 | BD Pharmingen            | 555531         |
| mouse anti-human CD25 PE                                 | BioLegend                | 302606         |
| mouse anti-human CD3 Ultra-LEAF                          | BioLegend                | 317326         |
| <b>Chemicals</b>                                         |                          |                |
| BD GolgiPlug™                                            | BD Biosciences           | 555029         |
| BD GolgiStop™                                            | BD Biosciences           | 554724         |
| BD Cytofix/Cytoperm™                                     | BD Biosciences           | 554722         |
| CellTrace™ Violet Cell Proliferation Kit                 | Thermo Fisher Scientific | C34557         |
| Latex beads, polystyrene                                 | Merck KGaA               | LB30           |
| LEGENDplex™ Human CD8/NK Panel (13-plex)                 | BioLegend                | 740267         |
| DELFI A BATDA Reagent                                    | Perkin Elmer             | C136-100       |
| DELFI A Europium Solution                                | Perkin Elmer             | C135-100       |
| Incucyte® CytoLight Rapid Red                            | Bioscience Sartorius     | 4706           |
| Incucyte® Cytotox Green Dye                              | Bioscience Sartorius     | 4633           |
| D-Luciferin sodium salt                                  | abcam                    | ab145164       |
| <b>Experimental model strains</b>                        |                          |                |
| NOD.Cg-Prkd <sup>scid</sup> Il2rg <sup>tm1Wjl</sup> /SzJ | Charles River            | Strain: 005557 |

### ***In vivo* study design**

The *in vivo* experiment's sample size was determined through careful power calculations based on prior published studies. Whenever possible, littermate controls were used. Both control and experimental mice were matched for age (8-16 weeks old) and sex. All experiment-generated data were thoroughly analyzed, and experimental results were consistently replicated, with the number of replicates clearly indicated in the figure legends.

Rigorous blinding procedures were implemented to minimize bias in animal experiments. In feasible blind experiments, steps were taken to ensure that the experimenter was unaware of the treatment of the animals during the data collection phase. However, it is important to note that in certain cases blinding was not feasible due to limitations in the experimental design or the nature of the measurements involved, as illustrated by the different groups of mice treated with 8H8\_SDIE or its MOPC\_SDIE control.
